# Supplementary material
Source: Research Square preprint supplement (doi:10.21203/rs.3.rs-9595740/v1)
Supplement: Supplementary file 1 [file 69cbfc4a428019a58bd7d0da.docx]

Additional file 1 for

**Tipping points of subtropical forest carbon sinks in southern China: Spatiotemporal dynamics and management insights**

**Contents of this file**

Table S1 to S2 and Figure S1 to S2

**Introduction**

This supporting information provides the same figures as seen in the main article

**Table S1 | Species Life history attribute data.**

| **Species** | **Common name** | **LO**  **NG** | **SM** | **ED** | **MD** | **VP** | | | |
| --- | --- | --- | --- | --- | --- | --- | --- | --- | --- |
| **probability** | | **Min Max** | |
| **[year]** | | **[m]** | | **[year]** | | | |
| *Altingia gracilipes* | Slender-stalked Altingia | 400 | 25 | 80 | 250 | 0.2 | 10 | | 90 |
| *Eucalyptus spp.* | Eucalyptus | 300 | 15 | 60 | 160 | 0.4 | 10 | | 80 |
| *Cupressus funebris* | Chinese Weeping Cypress | 500 | 35 | 70 | 200 | 0.4 | 4 | | 100 |
| *Pinus densiflora* | Japanese  Red Pine | 250 | 20 | 60 | 200 | 0.6 | 8 | | 75 |
| *Ilex spp.* | Holly | 150 | 12 | 60 | 180 | 0.6 | 5 | | 50 |
| *Baeckea frutescens* | Shrubby baeckea | 200 | 15 | 30 | 100 | 0.2 | 3 | | 40 |
| *Taxus* | Chinese Yew | 350 | 25 | 80 | 250 | 0.7 | 10 | | 90 |
| *Engelhardia roxburghiana* | Fenzel's Engelhardia | 100 | 10 | 30 | 100 | 0.8 | 2 | | 50 |
| *Eucalyptus grandis × urophylla* | Eucalyptus Grandi | 200 | 18 | 70 | 200 | 0.7 | 8 | | 90 |
| *Castanopsis fargesii Franch* | Evergreen-chinkapin | 150 | 30 | 60 | 250 | 0.6 | 6 | | 50 |
| *Lithocarpus glaber* | Japanese  Stone Oak | 120 | 15 | 20 | 200 | 0.6 | 5 | | 100 |
| *Dimocarpus longan* | Longan | 350 | 30 | 70 | 300 | 0.5 | 15 | | 120 |
| *Diospyros morrisiana* | Morris'  Persimmon | 250 | 20 | 40 | 200 | 0.5 | 15 | | 75 |
| **Species** | **Common name** | **LO**  **NG** | **SM** | **ED** | **MD** | **VP** | | | |
| **probability** | **Min** | | **Max** |
|  |  | **[year]** | | **[m]** | | **[year]** | | | |
| *Pinus massoniana* | Masson pine | 200 | 10 | 200 | 500 | 0 | 0 | | 0 |
| *Schima superba* | Chinese  Guger Tree | 300 | 20 | 20 | 200 | 0.6 | 5 | | 100 |
| *Machilus velutina* | Nanmu Machilus | 1000 | 50 | 40 | 120 | 0.5 | 6 | | 200 |
| *Cyclobalanopsis*  *glauca* | Blue  Japanese Oak | 200 | 7 | 20 | 50 | 0.4 | 6 | | 50 |
| *Cunninghamia lanceolata* | Chinese fir | 200 | 10 | 200 | 500 | 0.6 | 1 | | 80 |
| *Pinus elliottii* | Slash pine | 200 | 10 | 200 | 500 | 0 | 0 | | 0 |
| *Metasequoia glyptostroboides* | Dawn  Redwood | 150 | 10 | 40 | 150 | 0.4 | 5 | | 60 |
| *Rhodomyrtus tomentosa* | Downy Rosemyrtle | 300 | 15 | 50 | 150 | 0.4 | 10 | | 60 |
| *Castanopsis eyrei* | Eyre's Evergreen-chinkapin | 300 | 20 | 50 | 200 | 0.5 | 10 | | 80 |
| *Pinus*  *kwangtungensis* | Guangdong White Pine | 150 | 12 | 50 | 180 | 0.3 | 6 | | 70 |
| *Schefflera heptaphylla* | Ivy Tree | 200 | 20 | 50 | 150 | 0.3 | 5 | | 100 |
| *Keteleeria fortunei​​* | Fortune's Keteleeria | 250 | 20 | 60 | 150 | 0.4 | 8 | | 80 |
| *Cinnamomum porrectum* | Safrole Laurel | 1000 | 15 | 50 | 120 | 0.5 | 6 | | 200 |
| *Castanopsis carlesii* | Carles' Evergreen-chinkapin | 200 | 20 | 50 | 120 | 0.6 | 6 | | 100 |
| *Taxus cuspidata* | Japanese Yew | 300 | 20 | 70 | 300 | 0.5 | 15 | | 100 |

*Note.* LONG, longevity; SM, the age of sexual maturity; ED, effective seeding distance; MD, maximum seeding distance; VP, vegetative reproduction probability; MINVP, minimum age of vegetative reproduction; MAXVP, maximum age of vegetative reproduction.

**Table S2 | Statistical analysis of forest AGB slope distribution among classification areas under various climate scenarios.**

| **Classification** | **Climate**  **Scenario** | **Number of Pixels** | **Percentage of Study Area** | **Area** |
| --- | --- | --- | --- | --- |
| **[%]** | **[ha]** |
| Stable enhancement area | CC | 22,221 | 97 | 2,222,100 |
| SSP1-2.6 | 22,652 | 98.88 | 2,265,200 |
| SSP2-4.5 | 22,675 | 98.99 | 2,267,500 |
| SSP3-7.0 | 22,688 | 99.04 | 2,268,800 |
| SSP5-8.5 | 22,074 | 96.36 | 2,207,400 |
| Tipping point area | CC | 82 | 0.36 | 8,200 |
| SSP1-2.6 | 50 | 0.22 | 5,000 |
| **Classification** | **Climate**  **Scenario** | **Number of Pixels** | **Percentage of Study Area** | **Area** |
| **[%]** | **[ha]** |
| Tipping point area | SSP2-4.5 | 17 | 0.07 | 1,700 |
| SSP3-7.0 | 33 | 0.14 | 3,300 |
| SSP5-8.5 | 64 | 0.28 | 6,400 |
| Ecologically degraded area | CC | 605 | 2.64 | 60,500 |
| SSP1-2.6 | 206 | 0.9 | 20,600 |
| SSP2-4.5 | 216 | 0.94 | 21,600 |
| SSP3-7.0 | 187 | 0.82 | 18,700 |
| SSP5-8.5 | 770 | 3.36 | 77,000 |


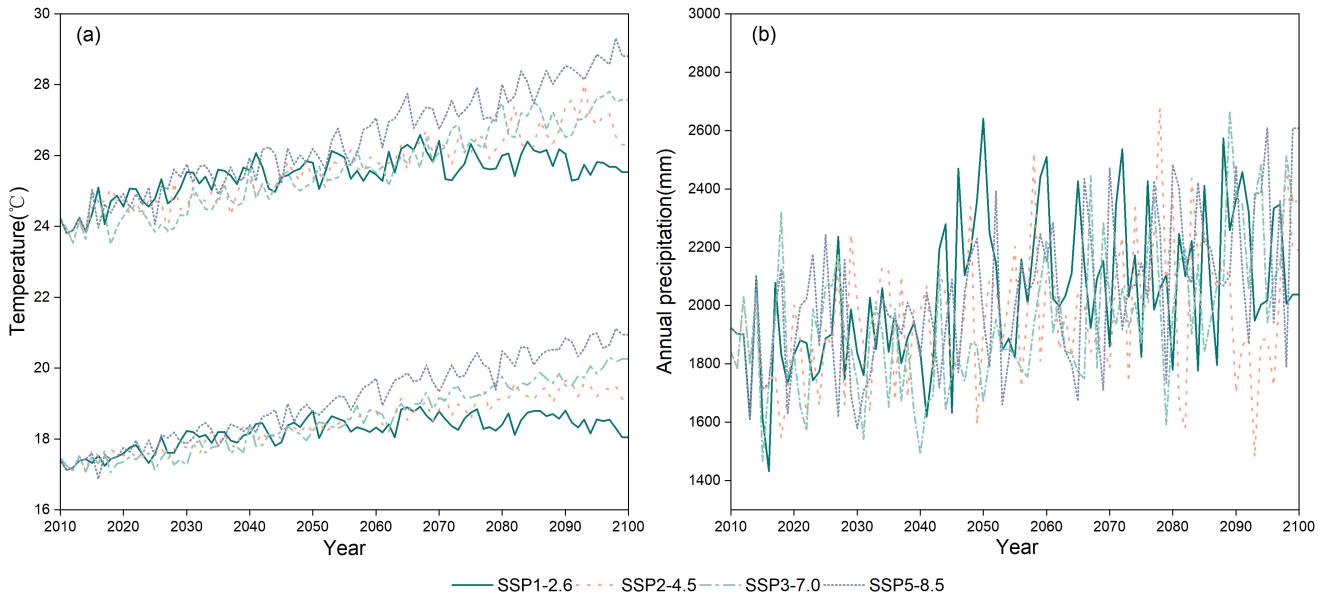


**Figure S1.** Meteorological data of GBA under different climate scenarios from 2010 to 2100. (a) Trends of maximum and minimum temperatures. (b) Trends of annual average precipitation.


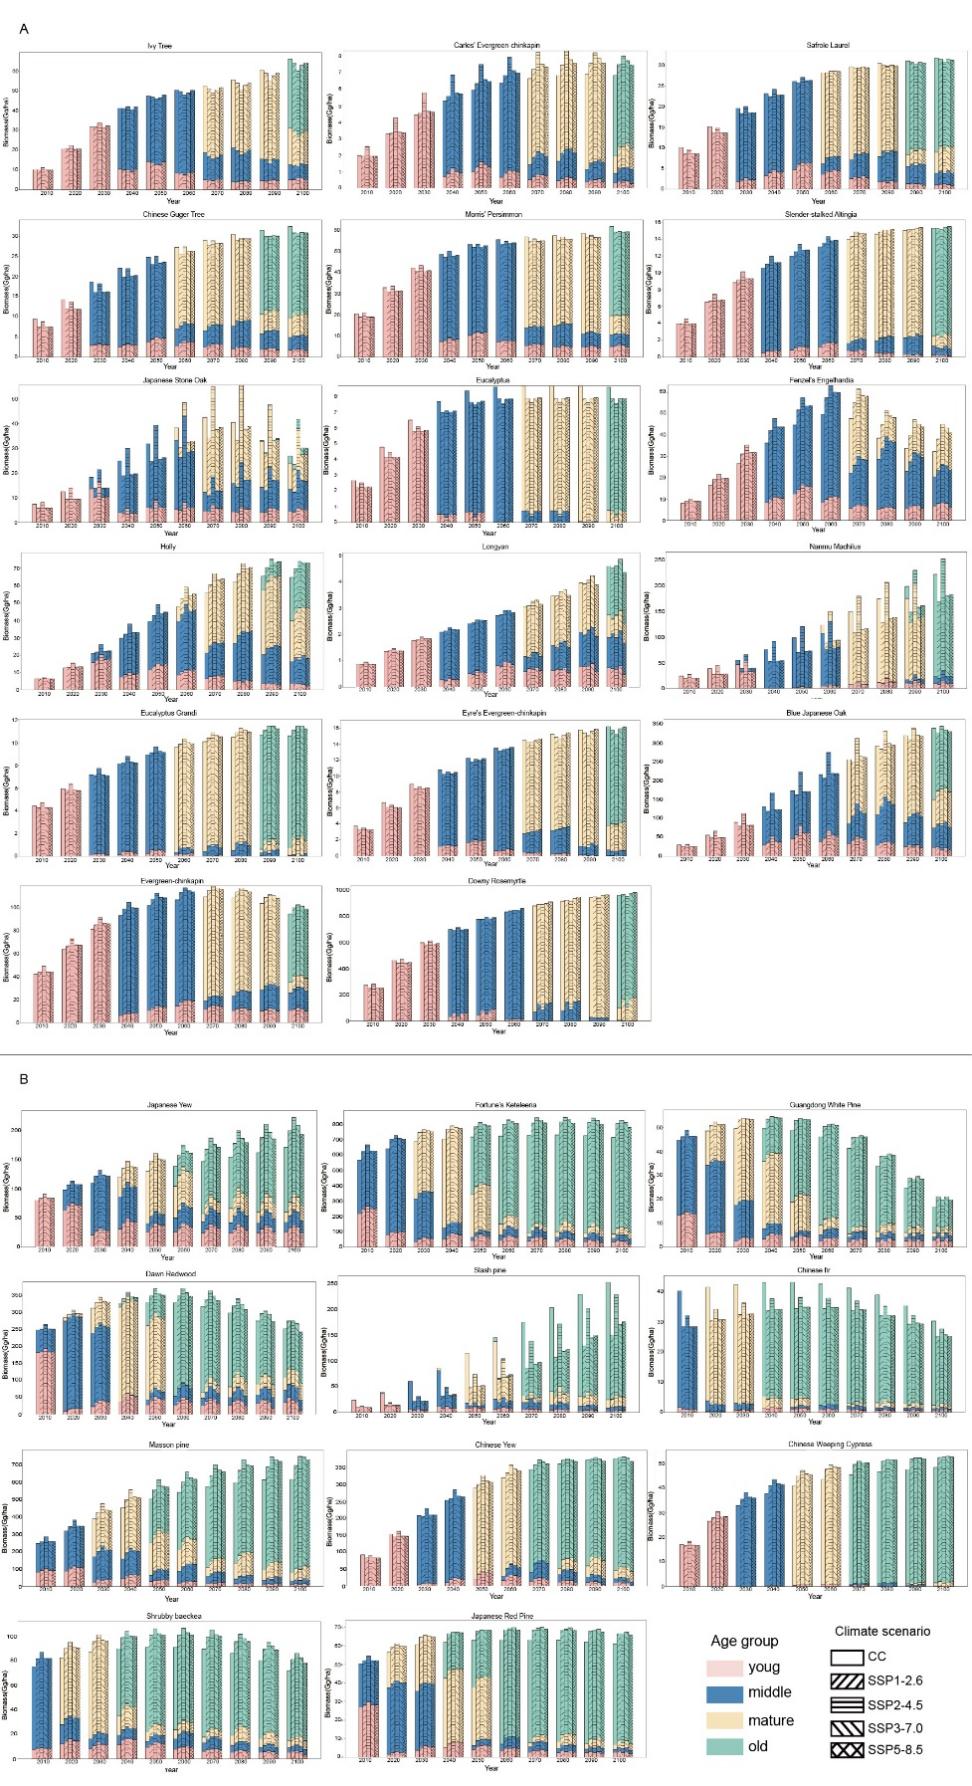


**Figure S2.** Age classes of single species under different climate scenarios from 2010 to 2100. (A) and (B) represent EBF and ENF, respectively.


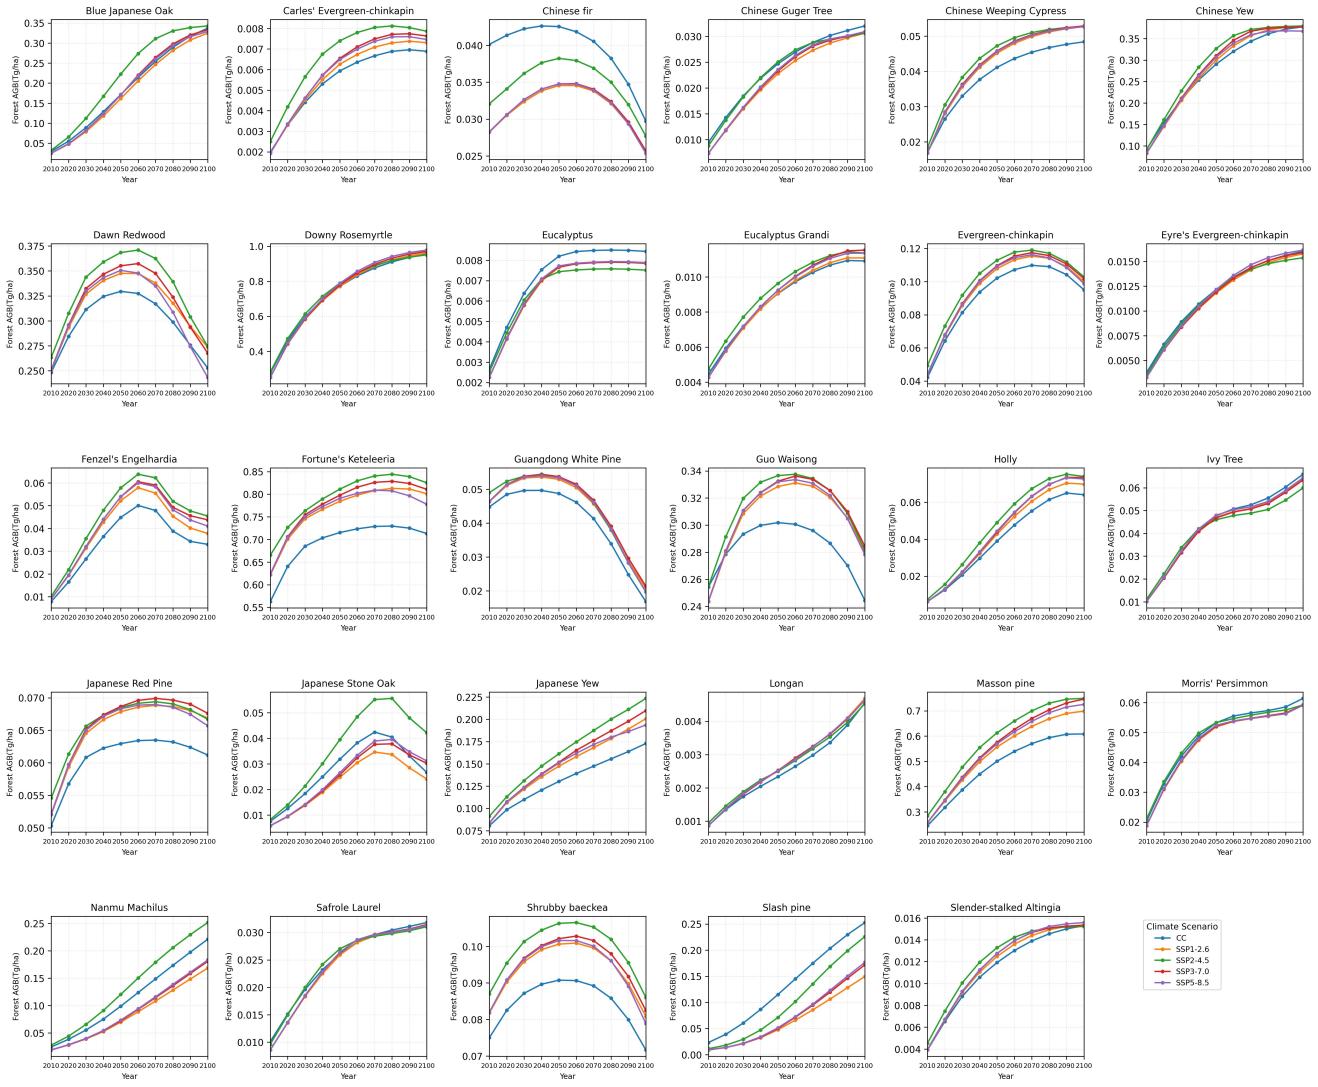


Figure S3. Forest aboveground biomass for single tree species under different climate scenarios during 2010 to 2100.
